# Supplementary material for: Elucidating the active sites for CO2 electroreduction on ligand-protected Au25 nanoclusters
Source: Royal Society of Chemistry journal article supplement (doi:10.1039/c8cy01099d), 2018-01-01
Supplement: c8cy01099d1.pdf [file c8cy01099d1.pdf]

## Supporting Information

### Elucidating the Active Sites for CO<sub>2</sub> Electroreduction on Ligand-protected Au<sub>25</sub> Nanoclusters

Natalie Austin<sup>a</sup>, Shuo Zhao<sup>b</sup>, James R. McKone<sup>a</sup>, Rongchao Jin<sup>b</sup> and Giannis Mpourmpakis<sup>a,\*</sup>

a. Department of Chemical Engineering, University of Pittsburgh, Pittsburgh, PA 15261, USA

b. Department of Chemistry, Carnegie Mellon University, Pittsburgh, PA 15213, USA

**Table S1.** Relative energies (to the lowest energy system) of the Au<sub>25</sub> nanoclusters optimized with different multiplicities.

|                                                                  | M1 | M3   | M5   |
|------------------------------------------------------------------|----|------|------|
| Au <sub>25</sub> (SCH <sub>3</sub> ) <sub>18</sub> <sup>-</sup>  | 0  | 0.96 | 1.88 |
| Au <sub>25</sub> (SCH <sub>3</sub> ) <sub>18</sub> <sup>+</sup>  | 0  | 0.13 | 1.15 |
| Au <sub>25</sub> (SCH <sub>3</sub> ) <sub>17</sub> <sup>0</sup>  | 0  | 0.53 | 1.51 |
| Au <sub>25</sub> S(SCH <sub>3</sub> ) <sub>17</sub> <sup>0</sup> | 0  | 0.38 | 1.43 |
|                                                                  | M2 | M4   | M6   |
| Au <sub>25</sub> (SCH <sub>3</sub> ) <sub>18</sub> <sup>0</sup>  | 0  | 0.98 | 1.96 |
| Au <sub>25</sub> (SCH <sub>3</sub> ) <sub>17</sub> <sup>-</sup>  | 0  | 0.93 | 2.03 |
| Au <sub>25</sub> S(SCH <sub>3</sub> ) <sub>17</sub> <sup>-</sup> | 0  | 0.95 | 1.98 |
| Au <sub>25</sub> (SCH <sub>3</sub> ) <sub>17</sub> <sup>+</sup>  | 0  | 0.60 | 1.80 |
| Au <sub>25</sub> S(SCH <sub>3</sub> ) <sub>17</sub> <sup>+</sup> | 0  | 0.44 | 1.60 |

**Table S2.** Computed adiabatic electron affinities (AEA) and adiabatic ionization potentials (AIP) of Au<sub>25</sub>(SCH<sub>3</sub>)<sub>18</sub><sup>0</sup>, Au<sub>25</sub>(SCH<sub>3</sub>)<sub>17</sub><sup>0</sup>, and Au<sub>25</sub>S(SCH<sub>3</sub>)<sub>17</sub><sup>0</sup> in eV

|                                                                  | <b>AEA</b> | <b>AIP</b> |
|------------------------------------------------------------------|------------|------------|
| Au <sub>25</sub> (SCH <sub>3</sub> ) <sub>18</sub> <sup>0</sup>  | -2.90      | 5.10       |
| Au <sub>25</sub> (SCH <sub>3</sub> ) <sub>17</sub> <sup>0</sup>  | -2.41      | 5.20       |
| Au <sub>25</sub> S(SCH <sub>3</sub> ) <sub>17</sub> <sup>0</sup> | -2.63      | 5.29       |

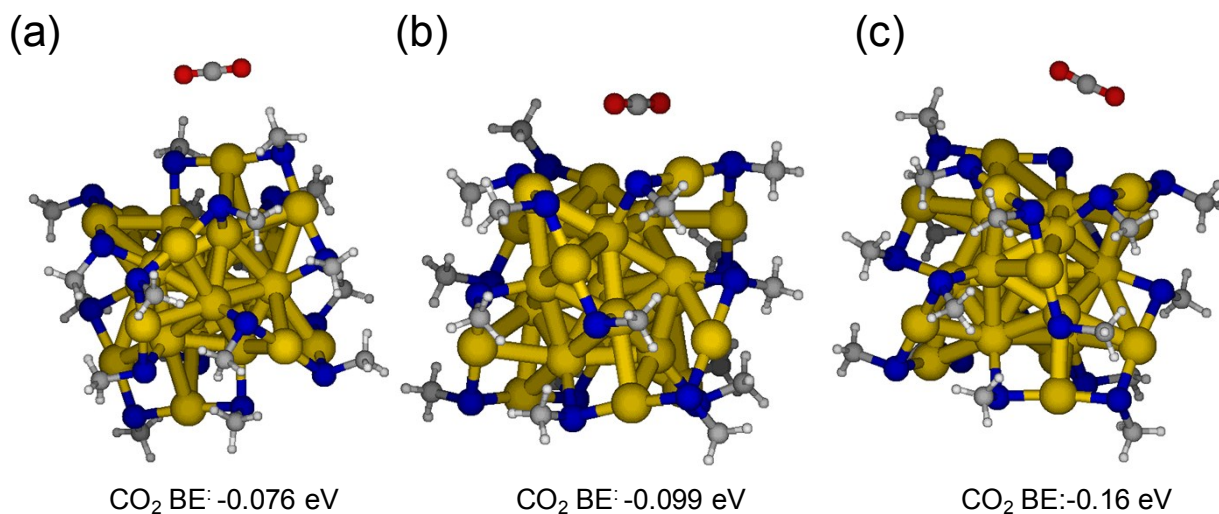

**Figure S1.** CO<sub>2</sub> adsorption on the negatively charged nanoclusters (a) Au<sub>25</sub>(SCH<sub>3</sub>)<sub>18</sub><sup>-</sup>, (b) Au<sub>25</sub>(SCH<sub>3</sub>)<sub>17</sub><sup>-</sup>, (c) Au<sub>25</sub>S(SCH<sub>3</sub>)<sub>17</sub><sup>-</sup>. Note that physisorption was observed on all the nanoclusters in this study (range: -0.07 to -0.16 eV).

|                                                                                    | Site A of removed SCH <sub>3</sub> | Site B of removed SCH <sub>3</sub>                                                  |
|------------------------------------------------------------------------------------|------------------------------------|-------------------------------------------------------------------------------------|
| 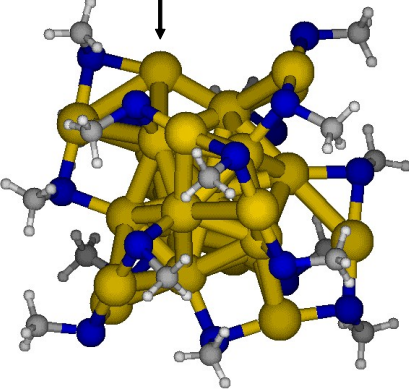 |                                    |  |
| $\Delta E(-)$                                                                      | 1.11                               | 1.37                                                                                |
| $\Delta E(0)$                                                                      | 0.65                               | 1.30                                                                                |
| $\Delta E(+)$                                                                      | 0.75                               | 1.47                                                                                |

**Figure S2.** Changes in electronic energy ( $\Delta E$ ) for the reaction step of SCH<sub>3</sub> removal from Site A and Site B (shown in manuscript) of the Au<sub>25</sub>(SCH<sub>3</sub>)<sub>18</sub><sup>-</sup> NC (values are in eV).

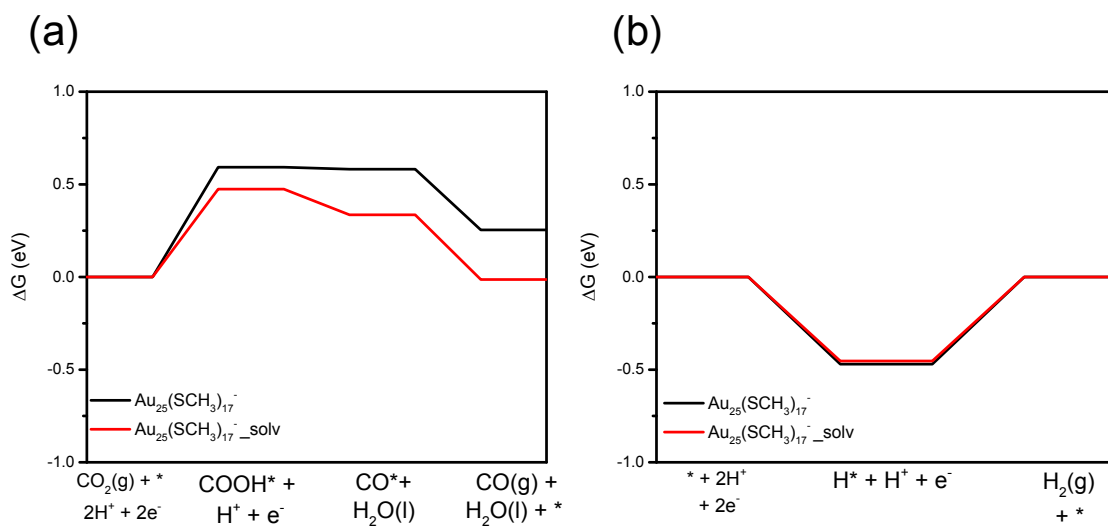

**Figure S3.** Free energy diagrams ( $\Delta G$ ) for the (a) reduction of CO<sub>2</sub> to CO and the (b) hydrogen evolution reaction on the Au<sub>25</sub>(SCH<sub>3</sub>)<sub>17</sub><sup>-</sup> NC with and without solvation effects in red and black, respectively. The Au<sub>25</sub>(SCH<sub>3</sub>)<sub>17</sub><sup>-</sup> NC and all reaction species were reoptimized with and without solvation in Turbomole using PBE/TZVP to utilize the implicit solvation model, COSMO.

### -SCH<sub>3</sub> or -SEthPh removal

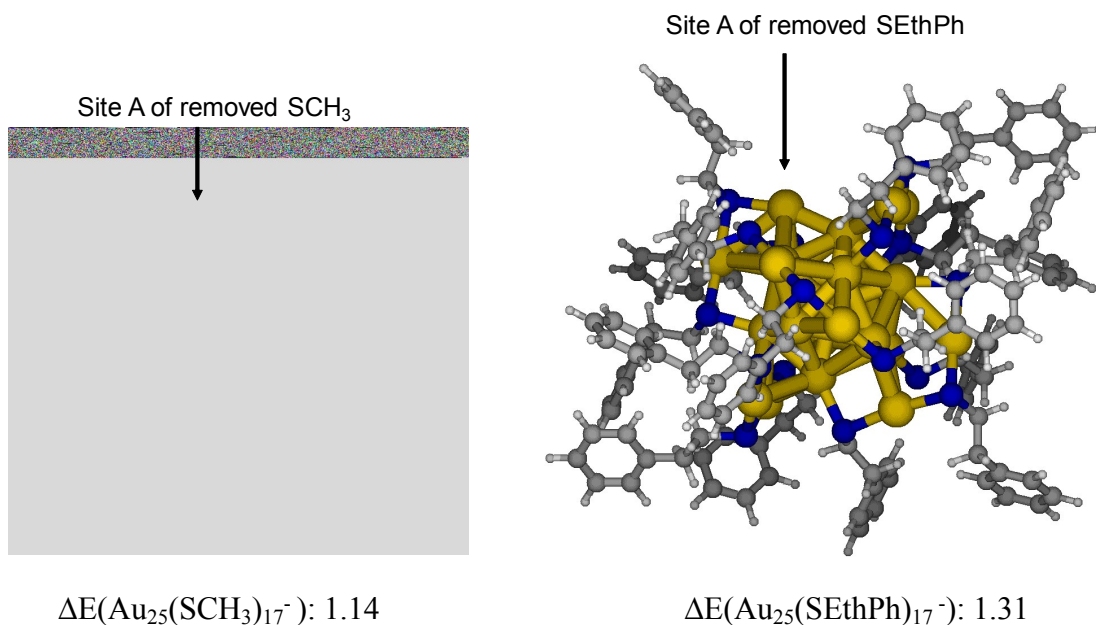

### -CH<sub>3</sub> or -EthPh removal

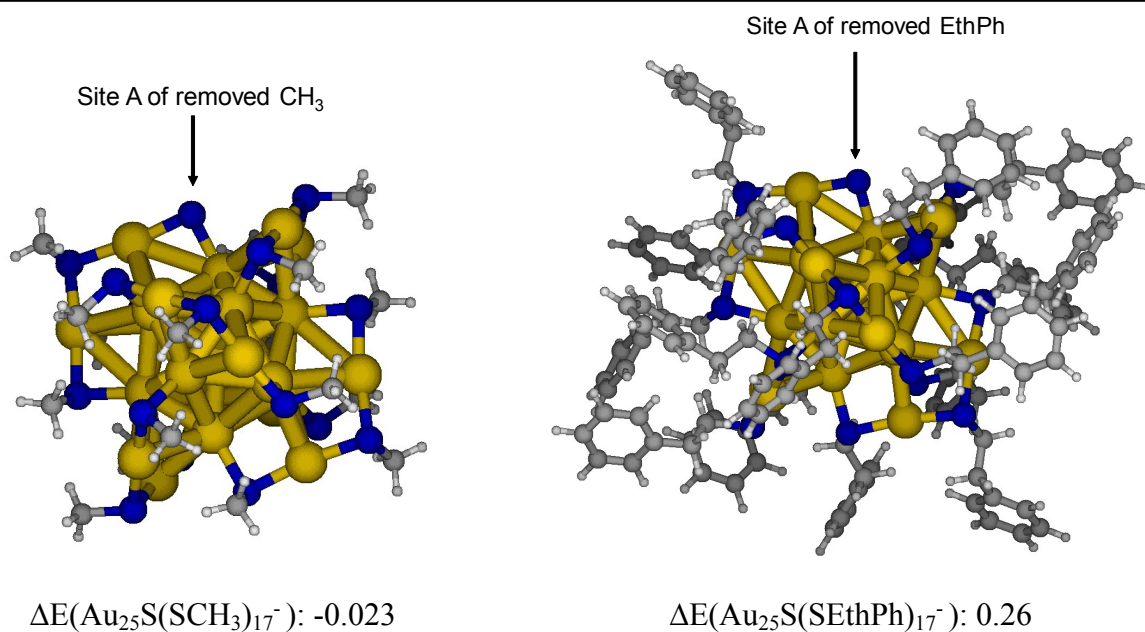

**Figure S4.** Electronic energy comparison for the reaction step of -SR and -R removal from  $\text{Au}_{25}(\text{SCH}_3)_{18}^-$  and  $\text{Au}_{25}(\text{EthPh})_{18}^-$ . The similar magnitude of the electronic energies between ligand removal on  $\text{Au}_{25}(\text{SCH}_3)_{18}^-$  and  $\text{Au}_{25}(\text{SEthPh})_{18}^-$  suggests that similar trends would hold for free energies, as electronic energies capture the majority of enthalpic contributions. This indicates that under reaction conditions removal of experimentally utilized ligands (-SEthPh) is possible.

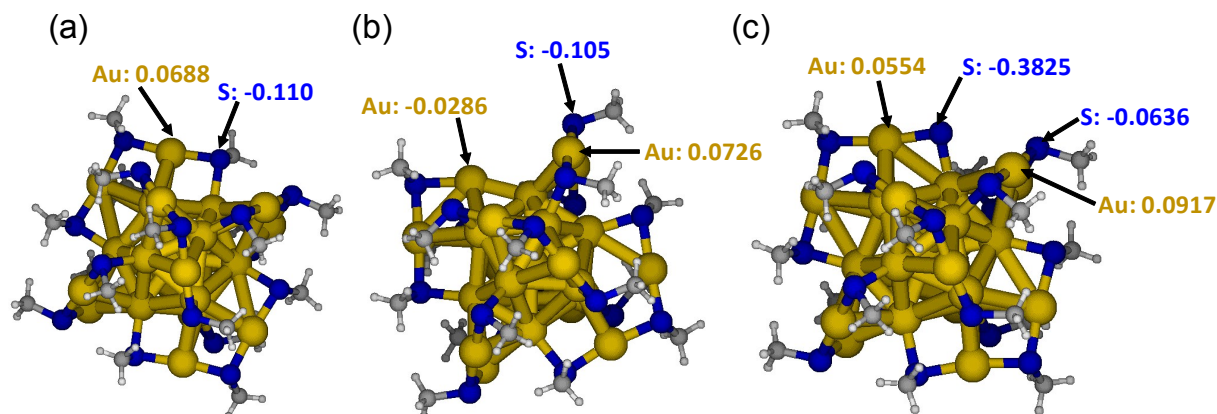

**Figure S5.** Bader charge analysis of select atoms from the negatively charged nanoclusters (a)  $\text{Au}_{25}(\text{SCH}_3)_{18}^-$ , (b)  $\text{Au}_{25}(\text{SCH}_3)_{17}^-$ , (c)  $\text{Au}_{25}\text{S}(\text{SCH}_3)_{17}^-$ .

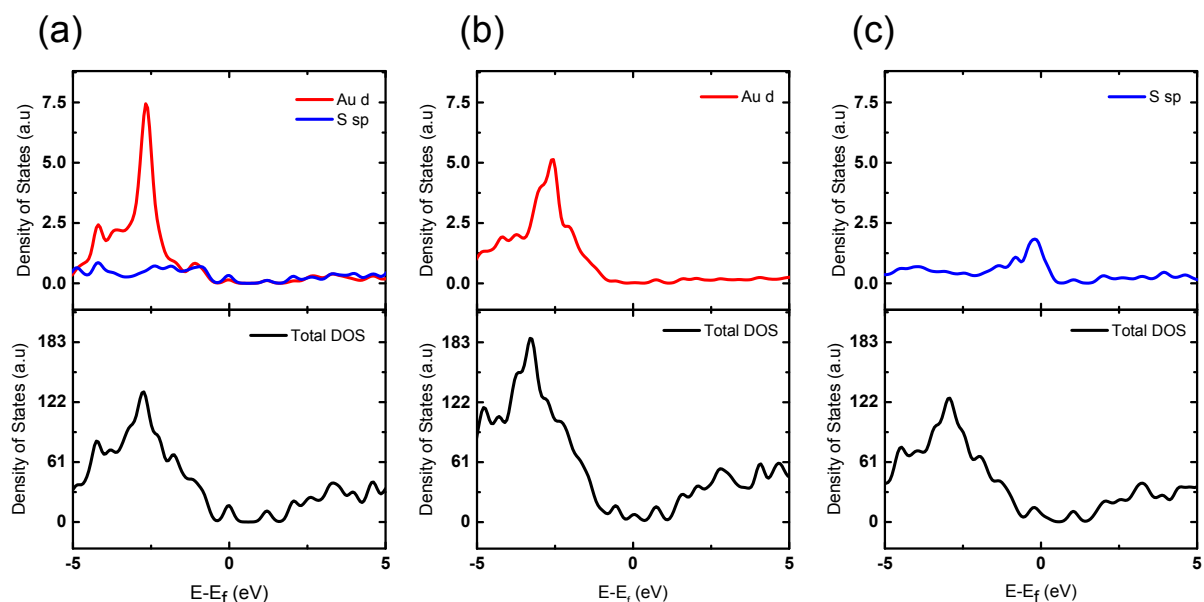

**Figure S6:** The projected density of states, PDOS (top graphs) for a ligand Au atom and a S atom of (a)  $\text{Au}_{25}(\text{SCH}_3)_{18}^-$ , the exposed Au atom of (b)  $\text{Au}_{25}(\text{SCH}_3)_{17}^-$ , and the exposed S atom of (c)  $\text{Au}_{25}\text{S}(\text{SCH}_3)_{17}^-$ . Comparison of the exposed S atom PDOS (s and p states) to the S atom PDOS of the fully protected NC, shows an increase in the electron density near the Fermi level (0 eV) of the  $\text{Au}_{25}\text{S}(\text{SCH}_3)_{17}^-$  NC which contributes to the reactivity of the NC. The total density of states for the (a)  $\text{Au}_{25}(\text{SCH}_3)_{18}^-$ , (b)  $\text{Au}_{25}(\text{SCH}_3)_{17}^-$ , and (c)  $\text{Au}_{25}\text{S}(\text{SCH}_3)_{17}^-$  NCs are shown in the bottom graphs.

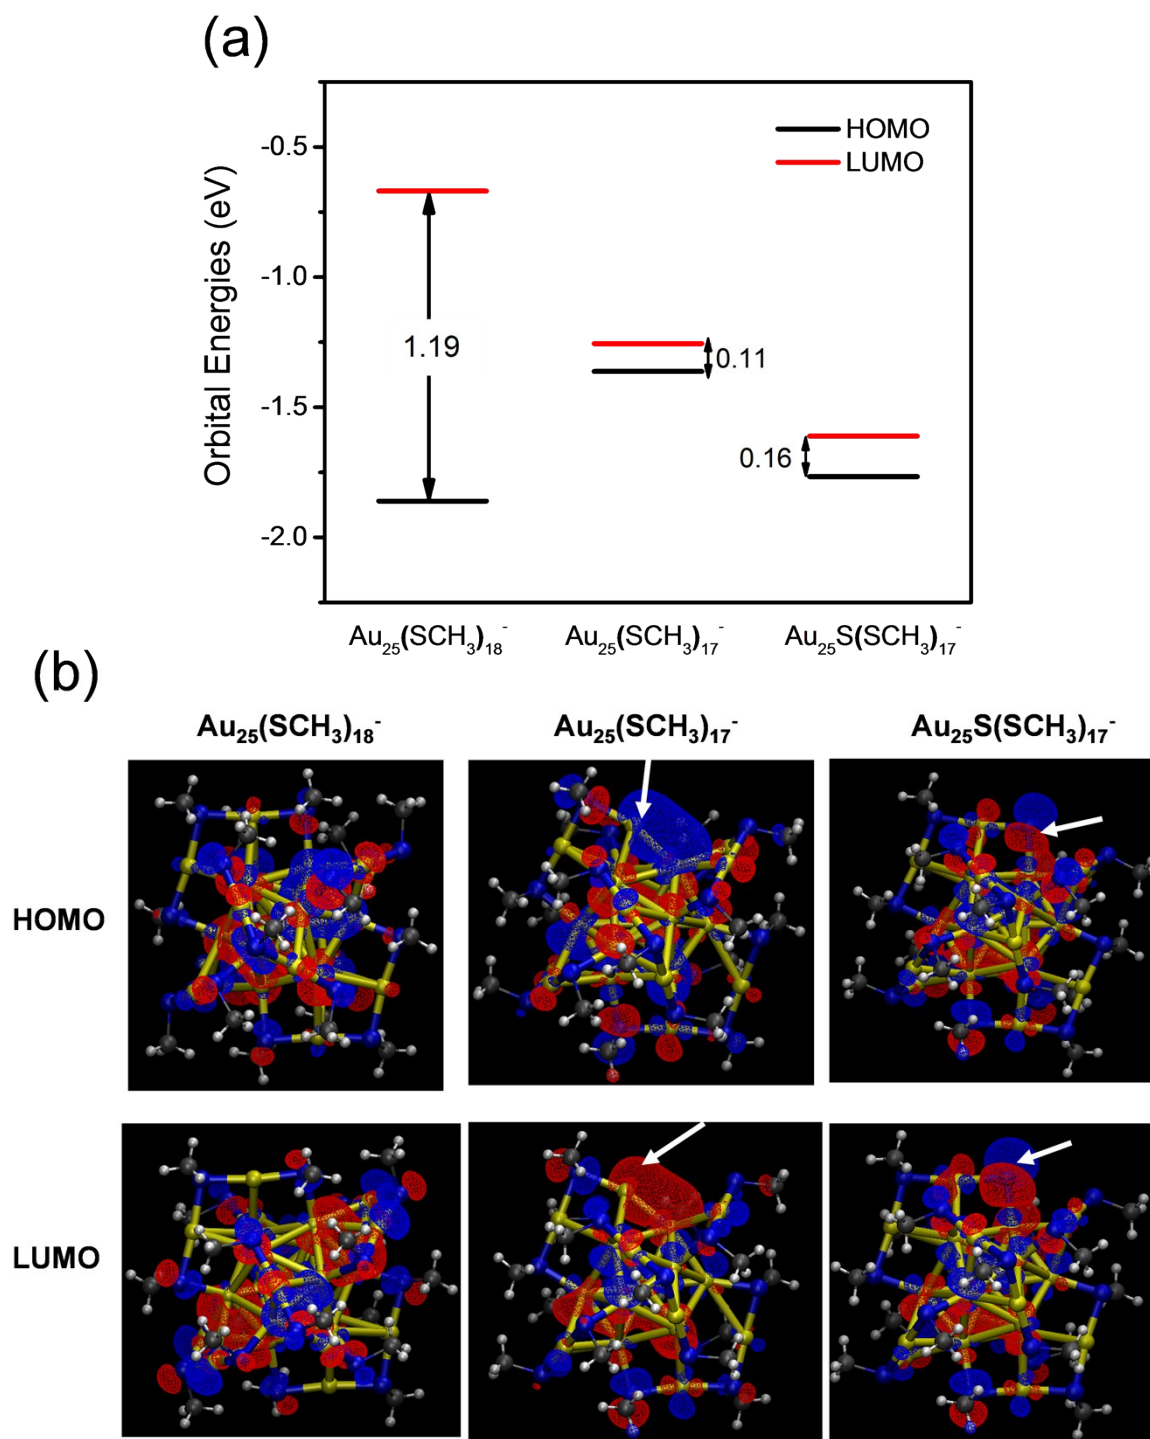

**Figure S7.** (a) HOMO-LUMO energy gaps (in eV) of the fully-protected and partially ligand-removed NCs. A dramatic decrease in the gap is observed with ligand removal. (b) Plots of the HOMO-LUMO orbitals. The white arrows point to the ligand removed sites ( $-\text{SCH}_3$  and  $-\text{CH}_3$ ) from the NCs. Compared to  $\text{Au}_{25}(\text{SCH}_3)_{18}^-$ , the electron density on the exposed Au site of  $\text{Au}_{25}(\text{SCH}_3)_{17}^-$  becomes more localized and the exposed S site of  $\text{Au}_{25}\text{S}(\text{SCH}_3)_{17}^-$  becomes more directional, both of which contribute to the reactivity of these generated sites.
